# Supplementary material
Source: publisher figshare collection journal article supplement (https://acs.figshare.com/ndownloader/files/5837508)
Supplement: Supplementary file 1 [file 5837508]

RE: OL0266976, OLetters

Supplementary material for  
**Polyethylene glycol (PEG) as reusable solvent medium for organic synthesis; Application in Heck reaction**

S. Chandrasekhar, Ch. Narsihmulu, S. Shameem Sultana and N. Ramakrishna Reddy

Standard reaction conditions: A mixture of aryl bromide (1 mmol), olefin (1 mmol), PEG-2000 (2g), triethylamine (1 mmol) and Pd(OAc)<sub>2</sub> (0.05 mmol) was placed in a 10 mL round bottomed flask and stirred at 80<sup>0</sup>C. After completion of the reaction (monitored by TLC) the reaction mixture was cooled and extracted with cold diethyl ether (3 x 10 mL) and purified by column chromatography.

***E*-Ethylcinnamate**

Data are in accordance with the data of a commercially available sample.

***E*-Stilbene**

Data are in accordance with the data of a commercially available sample.

***E* and *Z*-1-(2-butoxy-1-ethenyl) benzene**

Data are in accordance with literature (C-M. Anderson and A. Hallberg, *J. Org. Chem.* **1987**, 52, 3529).

***E*-4-methoxy-ethylcinnamate**

Data are in accordance with literature (T. A. Engles, K. O. Latessa, R. Iyengar, W. Chai and K. Agrios, *Biorg. Med. Chem.* **1996**, 4, 1755).

***E*-4-methoxystilbene**

Data are in accordance with literature (W. J. Ward, Jr., and W. E. Mc Ewen, *J. Org. Chem.* **1990**, 55, 493).

***E* and *Z*-1-(2-butoxy-1-ethenyl)-4-methoxy-benzene**

(*E*/*Z*=70:30); <sup>1</sup>H NMR (200 MHz, CDCl<sub>3</sub>): δ = 7.48-7.40 (m), 6.95-6.85 (m), 6.80 (d, J=13.0), 6.04 (d, J=7.1), 6.72 (d, J=13.0), 5.08 (d, J=7.1), 3.90-3.82 (m), 1.68-1.42 (m), 1.09-0.90 (m).

***E*-3,4-methylenedioxy ethylcinnamate**

Data are in accordance with literature (S. S. Bari, O. P. Vig, M. A. Satter, M. K. Sethi and A.K. Sharma, *J. Ind. Chem. Soc.* **1996**, 73, 520).

***E*-3,4-methylenedioxystilbene**

<sup>1</sup>H NMR (200 MHz, CDCl<sub>3</sub>): δ = 7.52-7.20 (m, 5H), 7.06 (s, 1H), 7.02-6.75 (m, 4H), 5.98 (s, 2H); MS: 224 [M<sup>+</sup>], 165, 141, 63, 43.

***E* and *Z*-1-(2-butoxy-1-ethenyl)-3,4-methylenedioxybenzene**

(*E/Z*=75:25); <sup>1</sup>H NMR (200 MHz, CDCl<sub>3</sub>): δ = 6.95-6.88 (m), 6.74 (d, *J*=13.4), 6.04 (d, *J*=7.0), 6.0 (s), 5.75 (d, *J*= 13.4), 5.08 (d, *J*=7.0), 3.94-3.86 (m), 1.72-1.42 (m), 1.02-0.94 (m).

***E*-4-chloro-ethylcinnamate**

Data are in accordance with literature (Z-L. Zhou, Y-Z. Huang and L-L Shi, *Tetrahedron*, **1993**, 49, 6821).

***E*-4-chlorostilbene**

Data are in accordance with literature (W. J. Ward, Jr., and W. E. Mc Ewen, *J. Org. Chem.* **1990**, 55, 493).

**1-(2-butoxy-(*E*)-1-ethenyl)-4-chloro-benzene**

<sup>1</sup>H NMR (200 MHz, CDCl<sub>3</sub>): δ = 7.25-7.04 (m, 4H), 6.9 (d, *J*=13.4 Hz, 1H), 5.72 (d, *J*=13.4 Hz, 1H), 3.8 (t, *J*=6.7 Hz, 2H), 1.8-1.6 (m, 2H), 1.55-1.4 (m, 2H), 1.0 (t, *J*=6.7 Hz, 3H); MS: *m/z* 210 [M<sup>+</sup>], 155, 141, 57, 43.

**Ethyl 3-(4a,8a-dihydro-2-naphthalenyl)-(E)-2-propenoate**

<sup>1</sup>H NMR (200 MHz, CDCl<sub>3</sub>): δ = 8.5 (d, *J*=15.6 Hz, 1H), 8.2 (d, *J*=8.9 Hz, 1H), 7.9-7.4 (m, 6H), 6.5 (d, *J*=15.6 Hz, 1H), 4.3 (q, *J*<sub>1,2</sub>=7.4 Hz, *J*<sub>1,3</sub>=14.1 Hz, 2H), 1.4 (t, *J*=7.4 Hz, 3H); MS: *m/z* 226 [M<sup>+</sup>].

**1-(naphthyl)-2-phenyl(*E*)-1-ethene**

Data are in accordance with literature (S- W. Li, Z-L. Zhou, Y-Z. Huang and L-L Shi, *J. Chem. Soc. Perkin Trans I*, **1991**, 1099).

***E* and *Z*-1-(2-butoxy-1-ethenyl)-naphthalene**

Data are in accordance with literature (W. Cabri, I. Candiani and A. Bedeschi, *J. Org. Chem.* **1990**, 55, 3654).
